# Supplementary material for: Genome-Enhanced Detection and Identification (GEDI) of plant pathogens
Source: PeerJ journal article supplement (doi:10.7717/peerj.4392), 2018-02-22

# Supplementary Figures

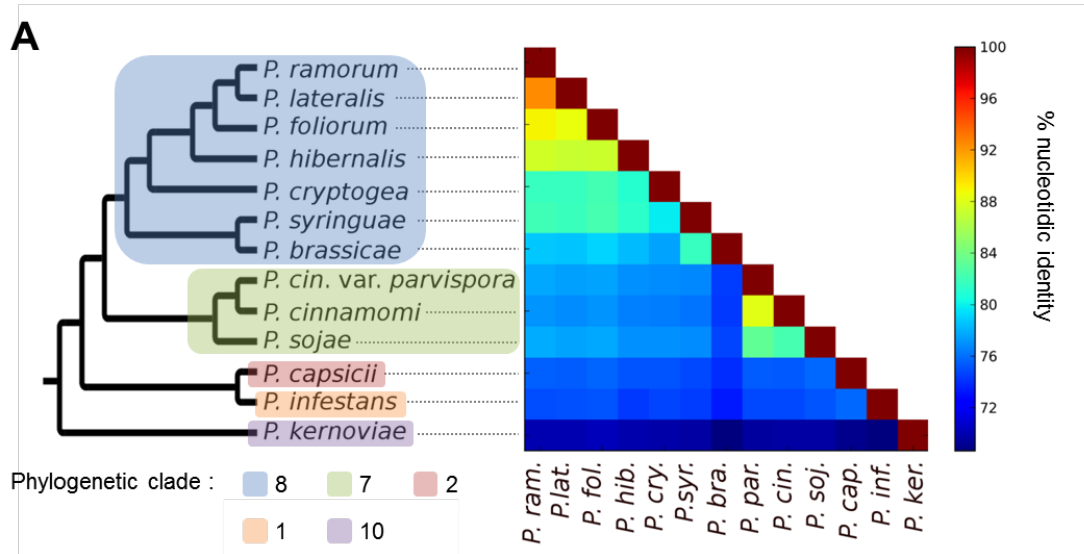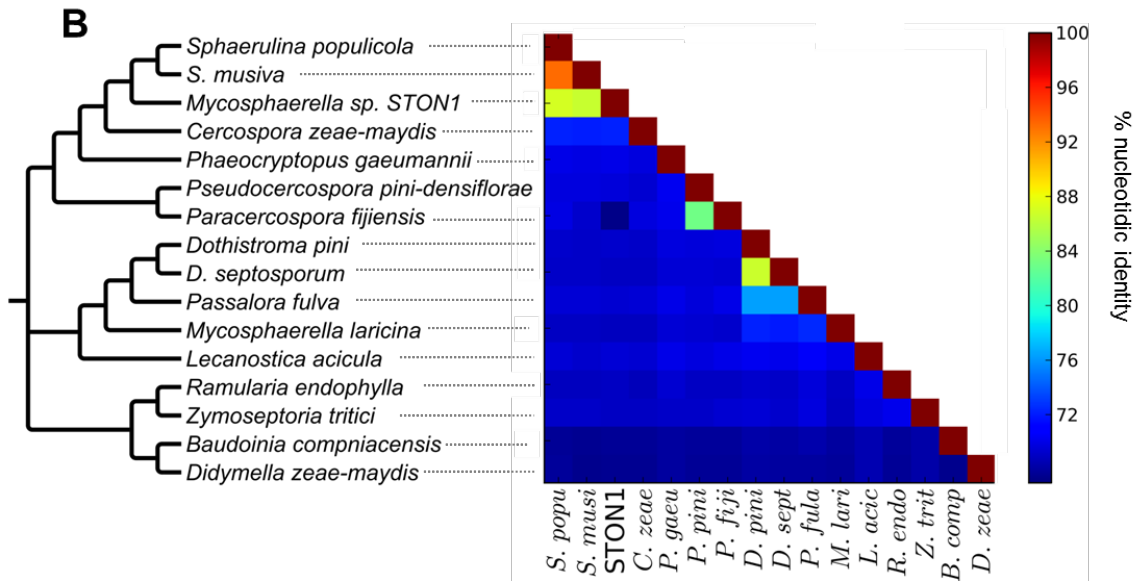

Supplement: Fig._S1.pdf [file Fig._S1.pdf]
