# Supplementary material for: Genome-Enhanced Detection and Identification (GEDI) of plant pathogens
Source: PeerJ journal article supplement (doi:10.7717/peerj.4392), 2018-02-22
Supplement: Fig_S2.pdf [file Fig_S2.pdf]

A – Module 2 - orthoMCL search

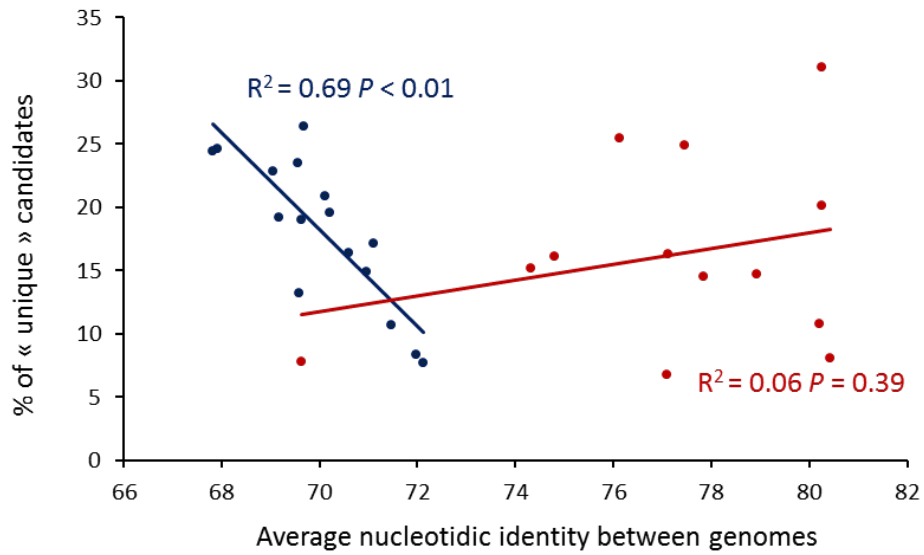

B – Module 3 - BLASTp and BLASTn filtering

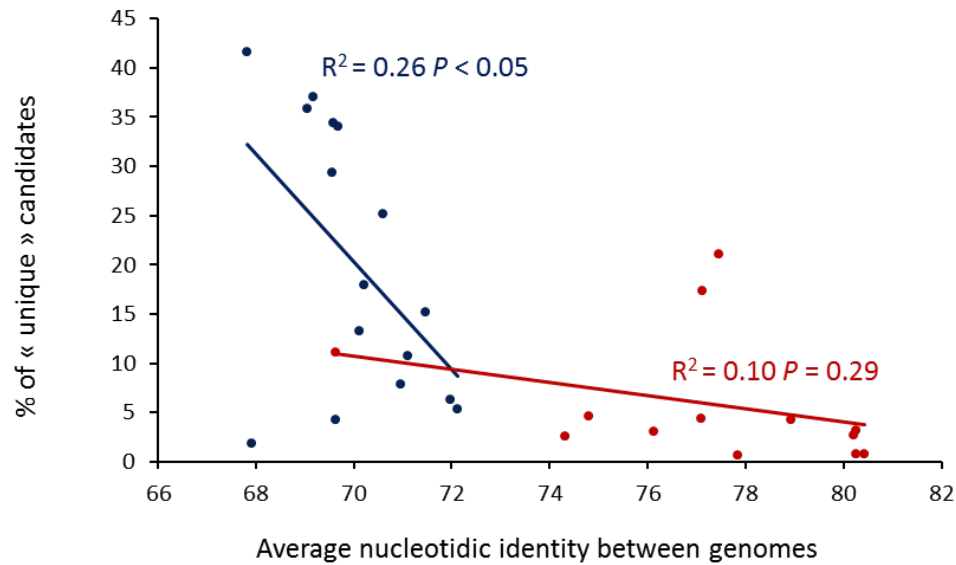

• Dothideomycetes dataset      • Phytophthora dataset

Figure S2. Relationships between the proportion of “unique” candidates and the average nucleotidic identity between genomes in the Phytophthora and Dothideomycetes datasets. A) Unique candidates as predicted in Module 2 of the pipeline (OrthoMCL search); B) unique candidates retained after Module 3 (filtering with BLASTp and BLASTn with e-value cutoff of  $1e-05$ ).
