# Supplementary material for: Genome-Enhanced Detection and Identification (GEDI) of plant pathogens
Source: PeerJ journal article supplement (doi:10.7717/peerj.4392), 2018-02-22

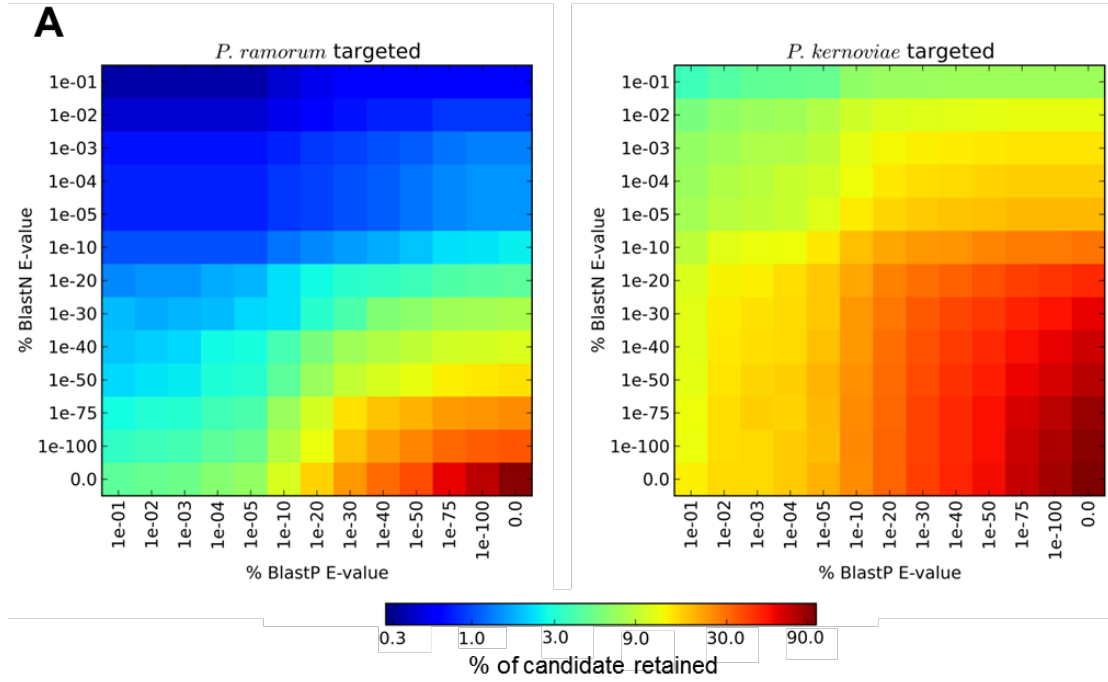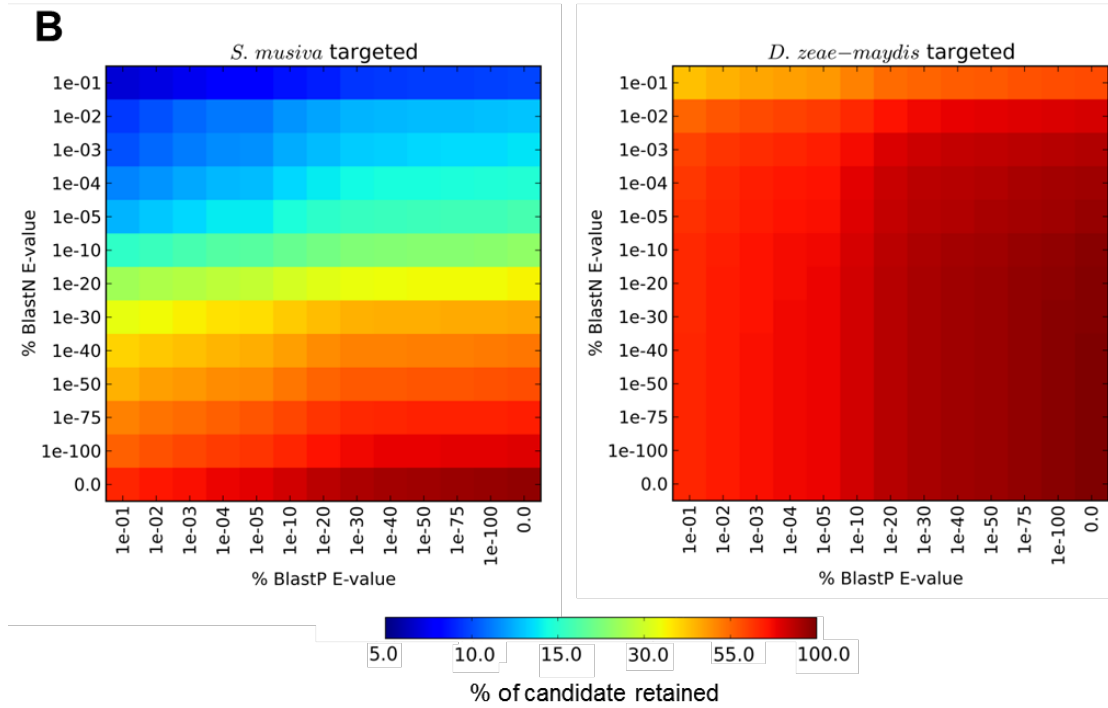

Supplement: Fig_S3.pdf [file Fig_S3.pdf]
